# Supplementary material
Source: HighWire-hosted journal article supplement (https://www.jrheum.org/highwire/filestream/39468/field_highwire_adjunct_files/0/191326DataSuppl.pdf)
Supplement: 191326DataSuppl.pdf [file 191326DataSuppl.pdf]

**ONLINE SUPPLEMENTARY MATERIAL**

**Supplementary Table 1.** Incidence rates and hazard ratios for composite CVD events associated with time varying methotrexate use, by specific biologic DMARD

|                                              | Biologic DMARDS | Methotrexate <sup>†</sup> unexposed |              |                         | Methotrexate <sup>†</sup> exposed |              |                         | Contrast <sup>‡</sup> |
|----------------------------------------------|-----------------|-------------------------------------|--------------|-------------------------|-----------------------------------|--------------|-------------------------|-----------------------|
|                                              |                 | Event                               | Person years | Incidence rate (95% CI) | Event                             | Person years | Incidence rate (95% CI) |                       |
| Myocardial infarction or stroke or fatal CVD | Abatacept       | 317                                 | 18237        | 17.4 (15.6, 19.4)       | 102                               | 8909         | 11.4 (9.4, 13.9)        | 0.74 (0.59, 0.93)     |
|                                              | Adalimumab      | 161                                 | 9852         | 16.3 (14.0, 19.1)       | 81                                | 6130         | 13.2 (10.6, 16.4)       | 0.91 (0.69, 1.20)     |
|                                              | Certolizumab    | 70                                  | 3819         | 18.3 (14.5, 23.2)       | 20                                | 2152         | 9.3 (6.0, 14.4)         | 0.59 (0.36, 0.98)     |
|                                              | Etanercept      | 163                                 | 11189        | 14.6 (12.5, 17.0)       | 74                                | 6042         | 12.2 (9.8, 15.4)        | 0.93 (0.70, 1.23)     |
|                                              | Golimumab       | 54                                  | 2646         | 20.4 (15.6, 26.6)       | 16                                | 1503         | 10.6 (6.5, 17.4)        | 0.59 (0.34, 1.04)     |
|                                              | Infliximab      | 334                                 | 14891        | 22.4 (20.1, 25.0)       | 180                               | 14060        | 12.8 (11.1, 14.8)       | 0.64 (0.54, 0.78)     |
|                                              | Rituximab       | 140                                 | 7660         | 18.3 (15.5, 21.6)       | 45                                | 3302         | 13.6 (10.2, 18.3)       | 0.91 (0.65, 1.29)     |
|                                              | Tocilizumab     | 85                                  | 5834         | 14.6 (11.8, 18.0)       | 19                                | 2214         | 8.6 (5.5, 13.5)         | 0.68 (0.41, 1.12)     |
| Myocardial infarction                        | Abatacept       | 166                                 | 18,327       | 9.1 (7.8, 10.6)         | 52                                | 8,944        | 5.8 (4.4, 7.6)          | 0.72 (0.51, 1.00)     |
|                                              | Adalimumab      | 79                                  | 9,900        | 8.0 (6.4, 10.0)         | 43                                | 6,147        | 7.0 (5.2, 9.4)          | 1.00 (0.68, 1.46)     |
|                                              | Certolizumab    | 33                                  | 3,833        | 8.6 (6.1, 12.1)         | 13                                | 2,157        | 6.0 (3.5, 10.4)         | 0.82 (0.43, 1.58)     |
|                                              | Etanercept      | 85                                  | 11,238       | 7.6 (6.1, 9.4)          | 40                                | 6,056        | 6.6 (4.9, 9.0)          | 0.97 (0.66, 1.43)     |
|                                              | Golimumab       | 19                                  | 2,659        | 7.1 (4.6, 11.2)         | <11                               | redacted     | 6.0 (3.1, 11.5)         | 0.95 (0.43, 2.10)     |
|                                              | Infliximab      | 198                                 | 15,010       | 13.2 (11.5, 15.2)       | 94                                | 14,153       | 6.6 (5.4, 8.1)          | 0.57 (0.44, 0.73)     |
|                                              | Rituximab       | 69                                  | 7,704        | 9.0 (7.1, 11.3)         | 27                                | 3,314        | 8.2 (5.6, 11.9)         | 1.13 (0.71, 1.77)     |
|                                              | Tocilizumab     | 45                                  | 5,854        | 7.7 (5.7, 10.3)         | 11                                | 2,221        | 5.0 (2.7, 9.0)          | 0.74 (0.38, 1.45)     |
| Stroke                                       | Abatacept       | 155                                 | 18,413       | 8.4 (7.2, 9.9)          | 45                                | 8,960        | 5.0 (3.8, 6.7)          | 0.66 (0.46, 0.92)     |
|                                              | Adalimumab      | 71                                  | 9,919        | 7.2 (5.7, 9.0)          | 31                                | 6,155        | 5.0 (3.5, 7.2)          | 0.77 (0.50, 1.18)     |
|                                              | Certolizumab    | 31                                  | 3,833        | 8.1 (5.7, 11.5)         | <11                               | redacted     | 3.7 (1.9, 7.4)          | 0.52 (0.24, 1.14)     |
|                                              | Etanercept      | 68                                  | 11,262       | 6.0 (4.8, 7.7)          | 31                                | 6,065        | 5.1 (3.6, 7.3)          | 0.90 (0.59, 1.39)     |
|                                              | Golimumab       | 33                                  | 2,658        | 12.4 (8.8, 17.5)        | <11                               | 1,505        | 4.7 (2.2, 9.8)          | 0.42 (0.18, 0.95)     |
|                                              | Infliximab      | 136                                 | 15,069       | 9.0 (7.6, 10.7)         | 89                                | 14,164       | 6.3 (5.1, 7.7)          | 0.77 (0.58, 1.01)     |
|                                              | Rituximab       | 65                                  | 7,715        | 8.4 (6.6, 10.7)         | 18                                | 3,321        | 5.4 (3.4, 8.6)          | 0.76 (0.45, 1.29)     |
|                                              | Tocilizumab     | 40                                  | 5,864        | 6.8 (5.0, 9.3)          | <11                               | redacted     | 4.5 (2.4, 8.4)          | 0.74 (0.37, 1.48)     |
| Myocardial infarction                        | Abatacept       | 304                                 | 18,237       | 16.7 (14.9, 18.7)       | 95                                | 8,909        | 10.7 (8.7, 13.0)        | 0.72 (0.56, 0.91)     |
|                                              | Adalimumab      | 148                                 | 9,852        | 15.0 (12.8, 17.7)       | 74                                | 6,130        | 12.1 (9.6, 15.2)        | 0.90 (0.68, 1.20)     |

|                                                             |              |     |        |                   |     |        |                   |                    |
|-------------------------------------------------------------|--------------|-----|--------|-------------------|-----|--------|-------------------|--------------------|
| or stroke                                                   | Certolizumab | 62  | 3,819  | 16.2 (12.7, 20.8) | 20  | 2,152  | 9.3 (6.0, 14.4)   | 0.66 (0.40, 1.11)  |
|                                                             | Etanercept   | 145 | 11,189 | 13.0 (11.0, 15.3) | 70  | 6,042  | 11.6 (9.2, 14.6)  | 0.98 (0.73, 1.31)  |
|                                                             | Golimumab    | 52  | 2,646  | 19.7 (15.0, 25.8) | 15  | 1,503  | 10.0 (6.0, 16.6)  | 0.57 (0.32, 1.02)  |
|                                                             | Infliximab   | 323 | 14,891 | 21.7 (19.5, 24.2) | 175 | 14,060 | 12.5 (10.7, 14.4) | 0.64 (0.53, 0.78)  |
|                                                             | Rituximab    | 127 | 7,660  | 16.6 (13.9, 19.7) | 45  | 3,302  | 13.6 (10.2, 18.3) | 1.00 (0.71, 1.41)  |
|                                                             | Tocilizumab  | 81  | 5,834  | 13.9 (11.2, 17.3) | 19  | 2,214  | 8.6 (5.5, 13.5)   | 0.71 (0.43, 1.17)  |
| Myocardial infarction, stroke, angina, PCI, CABG, fatal CVD | Abatacept    | 260 | 13,825 | 18.8 (16.7, 21.2) | 96  | 6,978  | 13.8 (11.3, 16.8) | 0.76 (0.60, 0.98)  |
|                                                             | Adalimumab   | 123 | 7,855  | 15.7 (13.1, 18.7) | 69  | 5,033  | 13.7 (9.1, 20.7)  | 0.91 (0.68, 1.24)  |
|                                                             | Certolizumab | 53  | 2,889  | 18.3 (14.0, 24.0) | 23  | 1,674  | 13.7 (9.1, 20.7)  | 0.798 (0.48, 1.31) |
|                                                             | Etanercept   | 129 | 8,868  | 14.5 (12.2, 17.3) | 68  | 4,886  | 13.9 (11.0, 17.7) | 0.98 (0.73, 1.33)  |
|                                                             | Golimumab    | 38  | 2,025  | 18.8 (13.7, 25.8) | 13  | 1,179  | 11.0 (6.4, 19.0)  | 0.61 (0.32, 1.15)  |
|                                                             | Infliximab   | 263 | 11,660 | 22.6 (20.0, 25.5) | 190 | 11,477 | 16.6 (14.4, 19.1) | 0.76 (0.63, 0.93)  |
|                                                             | Rituximab    | 110 | 5,672  | 19.4 (16.1, 23.4) | 37  | 2,539  | 14.6 (10.6, 20.1) | 0.83 (0.67, 1.21)  |
|                                                             | Tocilizumab  | 60  | 4,465  | 13.4 (10.4, 17.3) | 17  | 1,733  | 9.8 (6.1, 15.8)   | 0.77 (0.45, 1.33)  |

CI: Confidence interval; CVD: Cardiovascular disease; DMARDS: Disease-modifying antirheumatic drugs; HR: Hazard ratio; IR: Incidence rate per 1,000 person-years.

Redacted = data not shown to avoid disclosing cell sizes < 11

<sup>†</sup>Time varying methotrexate was defined as methotrexate day of supply with no extension.

<sup>‡</sup>In one model for each outcome, compares risk for time varying MTX versus nonuse within each biologic DMARD exposure row; adjusted for age, sex, race, Charlson comorbidity index, baseline MTX, hydroxychloroquine, leflunomide, sulfasalazine, heart failure, atrial fibrillation, abdominal aortic aneurism, peripheral arterial disease, diabetes, hyperlipidemia, hypertension, obesity, chronic kidney disease, chronic obstructive pulmonary disease, fibromyalgia, any hospitalized infection, any hospitalization, number of physician visit, time varying folic acid, nonsteroidal anti-inflammatory drug, statin potency, other lipid lowering drug use in baseline, number of biologic used prior initiation, oral steroid dose in six month before initiation, smoking, State Buy-In (poor), reasons other than age for eligible for Medicare, time varying folic acid, non-alcoholic fatty liver disease, and metabolic syndrome. Time varying folic acid was defined as days of supply with no extension. Time varying non-alcoholic fatty liver disease, and metabolic syndrome were defined using diagnosis code in both baseline and follow-up period.
